# Supplementary material for: Neighborhood Disadvantage and Neural Correlates of Threat and Reward Processing in Survivors of Recent Trauma
Source: PubMed Central journal article supplement (PMC10507487; doi:10.1001/jamanetworkopen.2023.34483), 2023-09-18
Supplement: jamanetwopen-e2334483-s002.pdf [file jamanetwopen-e2334483-s002.pdf]

## Data Sharing Statement

Webb. Neighborhood Disadvantage and Neural Correlates of Threat and Reward Processing in Survivors of Recent Trauma. *JAMA Netw Open*. Published online September 18, 2023.  
doi:10.1001/jamanetworkopen.2023.34483

### Data

**Data available:** Yes

**Data types:** Deidentified participant data

**How to access data:** Data is available through National Institute of Mental Health (NIMH) Data Archive (NDA). Dataset identifier(s): NIMH Data Archive Digital Object Identifier (DOI) 10.15154/1528773.

**When available:** With publication

### Supporting Documents

**Document types:** None

### Additional Information

**Who can access the data:** Individuals can access this data without researchers approval through through National Institute of Mental Health (NIMH) Data Archive (NDA). Dataset identifier(s): NIMH Data Archive Digital Object Identifier (DOI) 10.15154/1528773.

**Types of analyses:** Individuals can access this data without researchers approval through through National Institute of Mental Health (NIMH) Data Archive (NDA). Dataset identifier(s): NIMH Data Archive Digital Object Identifier (DOI) 10.15154/1528773.

**Mechanisms of data availability:** Individuals can access this data without researchers approval through through National Institute of Mental Health (NIMH) Data Archive (NDA). Dataset identifier(s): NIMH Data Archive Digital Object Identifier (DOI) 10.15154/1528773.
